# Supplementary material for: Evaluation of molecular inhibitors of loop-mediated isothermal amplification (LAMP)
Source: PubMed Central journal article supplement (PMC10928092; doi:10.1038/s41598-024-55241-z), 2024-03-11
Supplement: 41598_2024_55241_MOESM2_ESM.pdf [file 41598_2024_55241_MOESM2_ESM.pdf]

## **Supplementary Information**

### **Evaluation of molecular inhibitors of loop-mediated isothermal amplification (LAMP)**

**May Khat Nwe<sup>1</sup>, Nisachon Jangpromma<sup>2,3</sup>, Lapatrada Taemaitree<sup>1\*</sup>**

*<sup>1</sup>Department of Integrated Science, Forensic Science Program, Faculty of Science, Khon Kaen University, Khon Kaen 40002, Thailand*

*<sup>2</sup>Protein and Proteomics Research Center for Commercial and Industrial Purposes (ProCCI), Faculty of Science, Khon Kaen University, Khon Kaen 40002, Thailand*

*<sup>3</sup>Department of Biochemistry, Faculty of Science, Khon Kaen University, Khon Kaen 40002, Thailand*

\*Corresponding author. E-mail: lapata@kku.ac.th

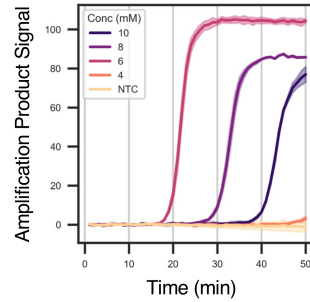

**Supplementary Figure 1 | Optimisation of magnesium sulfate concentration in real-time LAMP reactions.** Reactions containing 1 ng of DNA. 6 mM magnesium gave the earliest time to detection of DNA amplicons. Final magnesium concentrations (4, 6, 8 and 10 mM) are colour-coded, where solid lines represent the mean and the shaded areas represent the 95% confidence interval for signal (N = 2). *NTC* = no template control.

| <b>Bile salts</b>       |            |            |            |            |            |            |            |
|-------------------------|------------|------------|------------|------------|------------|------------|------------|
| Conc. (mM)              | 0          | 0.2        | 0.5        | 1          | 1.5        | 2          | 2.5        |
| $T_d$ (min)             | 15.6 ± 0.4 | 18.2 ± 0.4 | 24.5 ± 1.0 | 32.7 ± 1.1 | 40.1 ± 1.5 | 53.2 ± 1.1 | 51.0 ± 2.8 |
| <b>Calcium chloride</b> |            |            |            |            |            |            |            |
| Conc. (mM)              | 0          | 0.2        | 0.4        | 0.8        | 1.2        | 1.5        |            |
| $T_d$ (min)             | 17.4 ± 0.7 | 20.5 ± 0.8 | 24.1 ± 0.5 | 34.1 ± 1.1 | 44.3 ± 1.5 | 46.2 ± 3.3 |            |
| <b>IgG</b>              |            |            |            |            |            |            |            |
| Conc. (μM)              | 0          | 4          | 6          | 8          | 10         | 12         | 17.4       |
| $T_d$ (min)             | 16.2 ± 0.7 | 17.3 ± 1.1 | 17.4 ± 0.7 | 19.7 ± 0.4 | 20.7 ± 0.7 | 22.3 ± 1.5 | 28.8 ± 1.3 |
| <b>Urea</b>             |            |            |            |            |            |            |            |
| Conc. (mM)              | 0          | 10         | 50         | 150        | 400        | 800        | 1200       |
| $T_d$ (min)             | 16.4 ± 0.2 | 16.2 ± 0.0 | 16.3 ± 0.2 | 17.7 ± 0.2 | 18.3 ± 0.1 | 23.0 ± 0.7 | 31.8 ± 1.5 |
| <b>Hematin</b>          |            |            |            |            |            |            |            |
| Conc. (μM)              | 0          | 2.5        | 5          | 7.5        | 10         | 12.5       | 25         |
| $T_d$ (min)             | 18.4 ± 1.0 | 17.1 ± 0.6 | 16.7 ± 0.9 | 17.5 ± 0.1 | 18.5 ± 1.0 | 20.6 ± 1.5 | n.d.       |
| <b>Humic acid</b>       |            |            |            |            |            |            |            |
| Conc. (μg/mL)           | 0          | 0.9        | 2.7        | 3.6        | 5.4        | 9          |            |
| $T_d$ (min)             | 13.6 ± 0.1 | 13.3 ± 0.2 | 14.8 ± 0.0 | 16.0 ± 0.4 | 19.1 ± 1.2 | n.d.       |            |
| <b>Tannic acid</b>      |            |            |            |            |            |            |            |
| Conc. (μM)              | 0          | 25         | 45         | 50         | 60         | 180        |            |
| $T_d$ (min)             | 15.7 ± 0.2 | 15.9 ± 0.6 | 20.0 ± 0.1 | 17.2 ± 0.6 | 24.3 ± 0.7 | n.d.       |            |

**Supplementary Figure 2 | Time to detection ( $T_d$ ) of DNA amplicons in real-time LAMP reactions in the presence of various inhibitors.** The  $T_d$  values correspond to the time that the fluorescence signal is above 5 (significantly above the background). Errors represent the standard deviation of the mean (N = 2/3). n.d. = not determined.

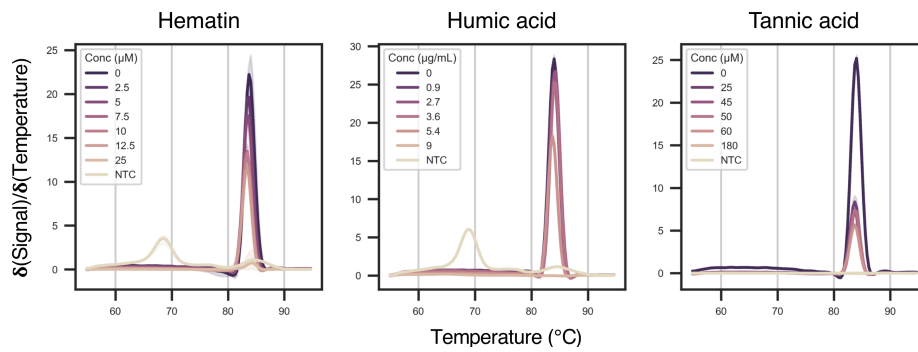

**Supplementary Figure 3 | The effect of various inhibitors (hematin, humic acid and tannic acid) on real-time LAMP product melting curves.** The presence of an unmoving peak indicates a single concatenated amplicon is formed with no differences in stability of the amplicon. Inhibitor concentrations are colour-coded per graph, while shaded areas represent that standard deviation in signal (N = 3). *NTC* = no template control.
